# Supplementary material for: First Report of the Plastid Genome of <em>Passiflora tripartita</em> var. <em>mollissima</em> (poro-poro) from Huánuco, Peru
Source: Preprints.org preprint supplement (doi:10.20944/preprints202306.0463.v1), 2023-06-06
Supplement: Supplementary file 1 [file supplementary]

## Sheet: PSL-1
Table S1: Details of the plastid genome sequences used for phylogenetic analysis.
Order	Family	Genus	Species	Genbank acession number
Malpighiales	Passifloraceae	Passiflora	Passiflora tripartita var. mollissima	OQ910395
Malpighiales	Passifloraceae	Passiflora	Passiflora foetida	NC_043825
Malpighiales	Passifloraceae	Passiflora	Passiflora caerulea	NC_053697
Malpighiales	Passifloraceae	Passiflora	Passiflora edulis	NC_034285
Malpighiales	Passifloraceae	Passiflora	Passiflora ligularis	NC_038122
Malpighiales	Passifloraceae	Passiflora	Passiflora cincinnata	NC_037690
Malpighiales	Passifloraceae	Passiflora	Passiflora serrulata	NC_050948
Malpighiales	Passifloraceae	Passiflora	Passiflora quadrangularis	NC_038126
Malpighiales	Passifloraceae	Passiflora	Passiflora xishuangbannaensis	NC_059723
Malpighiales	Passifloraceae	Passiflora	Passiflora contracta	NC_043818
Malpighiales	Passifloraceae	Passiflora	Passiflora microstipula	NC_043827
Malpighiales	Passifloraceae	Passiflora	Passiflora lutea	NC_043815
Malpighiales	Passifloraceae	Passiflora	Passiflora serratodigitata	NC_038127
Malpighiales	Passifloraceae	Passiflora	Passiflora serratifolia	NC_038129
Malpighiales	Passifloraceae	Passiflora	Passiflora laurifolia	NC_038121
Malpighiales	Passifloraceae	Passiflora	Passiflora nitida	NC_038123
Malpighiales	Passifloraceae	Passiflora	Passiflora tetrandra	NC_043820
Malpighiales	Passifloraceae	Passiflora	Passiflora vitifolia	NC_038128
Malpighiales	Passifloraceae	Passiflora	Passiflora actinia	NC_038118
Malpighiales	Passifloraceae	Passiflora	Passiflora oerstedii	NC_038124
Malpighiales	Passifloraceae	Passiflora	Passiflora menispermifolia	NC_043826
Malpighiales	Passifloraceae	Passiflora	Passiflora jatunsachensis	NC_043813
Malpighiales	Passifloraceae	Passiflora	Passiflora biflora	NC_038120
Malpighiales	Passifloraceae	Passiflora	Passiflora suberosa	NC_043814
Malpighiales	Passifloraceae	Passiflora	Passiflora tenuiloba	NC_043816
Malpighiales	Passifloraceae	Passiflora	Passiflora arbelaezii	NC_043819
Vitales	Vitaceae	Vitis	Vitis vinifera	NC_007957
